# Supplementary material for: Mechanisms of Adsorption of Heavy Metal Cations from Waters by an Amino Bio-Based Resin Derived from Rosin
Source: Polymers (Basel). 2019 Jun 3;11(6):969. doi: 10.3390/polym11060969 (PMC6630295; doi:10.3390/polym11060969)
Supplement: Supplementary file 1 [file polymers-11-00969-s001.pdf]

***Supporting information***

**Mechanisms of adsorption of heavy metal cations from waters by an amino bio-based resin derived from rosin**

Wanting Huang<sup>1</sup>, Kaisheng Diao<sup>1</sup>, Xuecai Tan<sup>1</sup>, Fuhou Lei<sup>1</sup>, Jianxin Jiang<sup>1, 2</sup>,  
Bernard A. Goodman<sup>1,3</sup>, Yahong Ma<sup>1</sup>, Shaogang Liu<sup>1\*</sup>

<sup>1</sup> *Guangxi Key Laboratory of Chemistry and Engineering of Forest Products, Guangxi Colleges and Universities Key Laboratory of Food Safety and Pharmaceutical Analytical Chemistry, School of Chemistry and Chemical Engineering, Guangxi University for Nationalities, Nanning 530008, Guangxi, China.*

<sup>2</sup> *Department of Chemistry and Chemical Engineering, MOE Engineering Research Center of Forestry Biomass Materials and Bioenergy, Beijing Forestry University, Beijing 100083, China.*

<sup>3</sup> *College of Physical Science and Engineering, Guangxi University, Nanning 530004, Guangxi, China.*

Corresponding author: (S G, Liu) Phone: 86-0771-3267019; e-mail: [liushaogang2005@163.com](mailto:liushaogang2005@163.com)

The supporting information includes 31 pages, 9 texts, 9 figures, and 7 tables.

|    |                                                                                               |
|----|-----------------------------------------------------------------------------------------------|
| 23 | <b>Contents</b>                                                                               |
| 24 | <b>Text S1.</b> Resin synthesis.                                                              |
| 25 | <b>Text S2.</b> Characterization of resin.                                                    |
| 26 | <b>Text S3.</b> Calculation of adsorption amount and removal efficiency of HMs.               |
| 27 | <b>Text S4.</b> Quantum chemical calculation.                                                 |
| 28 | <b>Text S5.</b> Adsorption isotherm models.                                                   |
| 29 | <b>Text S6.</b> Adsorption isotherm models for multi-component systems.                       |
| 30 | <b>Text S7.</b> Calculation of thermodynamic parameters.                                      |
| 31 | <b>Text S8.</b> Equations for kinetic models.                                                 |
| 32 | <b>Text S9.</b> Dynamic adsorption performance models.                                        |
| 33 |                                                                                               |
| 34 | <b>Fig. S1.</b> Effect of adsorbent dosage on HMs adsorption on EDAR (a) and removal          |
| 35 | from solution (b). Experimental conditions: $[HMs]_0 = 0.5 \text{ mM}$ , contact time = 24 h, |
| 36 | pH 5.0, 25 °C.                                                                                |
| 37 | <b>Fig. S2.</b> N <sub>2</sub> adsorption-desorption isotherms for EDAR.                      |
| 38 | <b>Fig. S3.</b> Adsorption of 0.5 mM Pb(II), Cd(II) and Cu(II) on various adsorbents at pH    |
| 39 | 5.0 and 25°C using 1.0 g/L adsorbent dosage.                                                  |
| 40 | <b>Fig. S4.</b> Experimental results for the competitive adsorption of Pb, Cd, and Cu in      |
| 41 | binary systems presented in the linear form of the Langmuir competitive model.                |
| 42 | <b>Fig. S5.</b> Effect of different parameters on the adsorption of Pb(II), Cd(II) and Cu(II) |
| 43 | by EDAR. (a) solution pH; (b) ionic strength; (c) Ca(II) and Mg(II); (d) HA. (e)              |
| 44 | contact time; (f) Pseudo-second-order; (g) Intra-particle diffusion model; (h)                |
| 45 | temperature; (i) Plots of $\ln k_d$ versus $1/T$ for the adsorption of Pb(II), Cd(II) and     |
| 46 | Cu(II) by EDAR; (j) different water matrixes. Experimental conditions: $[HMs] =$              |
| 47 | 0.5 mM (except for adsorption isotherm test), $[EDAR \text{ dosage}] = 1.0 \text{ g/L}$ , pH  |
| 48 | 5.0(except for pH test), 25°C (except for temperature test).                                  |
| 49 | <b>Fig. S6.</b> Variation in zeta potential of EDAR and MAR as a function of pH.              |
| 50 | <b>Fig. S7.</b> Comparison of experimental curves for adsorption of Pb(II), Cd(II), and       |
| 51 | Cu(II) on EDAR with predicted breakthrough curves obtained from the Thomas,                   |

Adams Bohart, and Yoon–Nelson models.

**Fig. S8.** FTIR spectra of EDAR before and after adsorption of Pb(II), Cd(II), and Cu(II).

**Fig. S9.** XPS O1s spectra of EDAR before (a) and after adsorption of Pb(II) (b), Cd(II) (c), and Cu(II) (d).

**Fig. S10.** Initial geometries (H1-H7) used for calculations of Pb(II) coordination to EDAR, and the corresponding optimized coordination geometries (O1-O3).

**Table S1.** Physicochemical properties of the adsorbents used in the study.

**Table S2.** Main characteristics of the natural water samples used in this study.

**Table S3.** Adsorption isotherm model constants for single systems at 25 °C.

**Table S4.** Comparison of adsorption capacities of various adsorbents for HMs at pH 5.0.

**Table S5.** Kinetic parameters for the adsorption of Pb(II), Cd(II), and Cu(II) on EDAR.

**Table S6.** Thermodynamic parameters for the adsorption of HMs on EDAR (0.5 mM HMs).

**Table S7.** Parameters for the Thomas, Adams–Bohart, and Yoon–Nelson dynamic adsorption models fitted for Pb(II), Cd(II), and Cu(II).

**Table S8.** Changes in lengths of selected bonds in EDAR model aa as a result of complexation with Pb(II) (in Å°).

**Supplementary References**

## **Text S1. Resin Synthesis.**

Polymerization was performed in a mixture of monomer (9.5 g methylacrylic acid), crosslinking agent (1.0 g EGMRA, prepared as described in Scheme S1)), initiator (0.2 g AIBN), and toluene (50 mL) at 85 °C for 3 h, whilst being deoxygenated with nitrogen gas. The rosin-based resin of methylacrylic acid (MAR) was separated by filtration, and washed repeatedly with deionized water (60 °C) and ethanol to remove residual materials; the yield was 73%. The synthetic process is shown in Scheme 1.

EDAR was then synthesized by adding ethylenediamine dropwise to refluxing MAR (10 g) in thionyl chloride (50 mL) and the mixture refluxed for 4 h; prior to the reaction, MAR was soaked in benzene (50 mL) at room temperature for 12 h, EDAR was filtered, washed with deionized water, then subsequently extracted with ethanol for 4 h. The final product was dried under vacuum at 50 °C for 8 h before characterization and use in absorption studies. The overall synthetic process is shown in Scheme 1.

## **Text S2. Characterization of Resin.**

<sup>13</sup>C nuclear magnetic resonance (NMR) spectra were obtained at room temperature (~22 °C) in 1% deuterated acetic acid using a Bruker AMX 500 spectrometer (100.62 MHz for <sup>13</sup>C NMR). Elemental analyses were performed with an Elemental Analyzer (EA, Elemental Vario MICRO) and Fourier transform infrared (FT-IR) spectra were obtained with a Nicolet 5700 FTIR spectrometer (Thermo Nicolet Co., USA). Sample morphology was examined by field emission scanning electron microscopy (FE-SEM, SUPRA 55, Carl Zeiss AG), and thermal stability was tested using a TGA Q50 simultaneous thermal analyzer (Waters, USA), in which the sample was heated from 35 to 700 °C at a rate of 10 °C/min under a N<sub>2</sub> flow rate of 100 mL/min. Zeta potentials of EDAR and MAR were measured in a Zetasizer 2000 Analyzer (Malvern, Mastersizer 2000 Instruments Co., USA). The BET specific surface areas and pore sizes of adsorbents were determined by N<sub>2</sub> adsorption–desorption isotherms using an automatic surface analyzer (ASAP2020, Micromeritics, USA). Chemical analyses of EDAR and its HM-loaded composites were conducted by X-ray photoelectron spectroscopy (XPS, ESCALAB 250), in which the XPSPEAK41 software was used to fit the XPS spectra. Electron paramagnetic resonance (EPR) spectra were acquired as either 1<sup>st</sup> or 2<sup>nd</sup> derivatives of the microwave absorption at room temperature from selected samples (~25 °C) on a Bruker A300 X-band spectrometer equipped with a Gunn diode microwave source and a high sensitivity resonance cavity. Spectral acquisition parameters were: 5 mW microwave power, 100 kHz modulation frequency, 5 gauss modulation amplitude, center field 3100 gauss, scan range 1500 gauss, and resolution 2048 points.

**Text S3. Calculation of adsorption amount and removal efficiency of HMs**

The amounts of HMs adsorbed by EDAR and their removal efficiency from water were calculated using the following equations:

$$q_t = \frac{(C_0 - C_t)V}{m} \quad (S1)$$

$$\text{HM removal efficiency \%} = \frac{(C_0 - C_t)}{C_0} \times 100 \quad (S2)$$

where  $C_0$  and  $C_t$  (mmol/L) are the concentrations of HMs in aqueous solution initially and at time  $t$ , respectively;  $q_t$  (mmol/g) is the amount of HMs adsorbed at equilibrium,  $v$  is the volume of HMs solution (L),  $m$  is the mass of adsorbent (g).

#### **Text S4. Quantum chemical calculations.**

These models and metal complexes were preliminarily optimized by Molecular Mechanics (MM+) prior to more accurate calculation. The geometries of all species were fully optimized by density functional theory (DFT) without restrictions, using the Becke3 parameter exchange function of the Lee-Yang-Parr correlation function (B3LYP) [1] with the 6-31G \*\* basis set for the C, H, O, N atoms except that the metal ions were in the pseudopotential basis set of Lanl2dz. Single point frequency calculations of these optimized geometries ensured their minimum energy structures. The interaction energy ( $\Delta E$ ) between adsorbate and adsorbent can evaluate the relative electron donating ability of dimers with different functional groups, and its use is feasible for describing the complexation of a given metallic ion. It is defined by Eq. (2).

$$\Delta E = E(\text{DM}) - [E(\text{M}) + E(\text{D})] \quad (\text{S3})$$

where  $E(\text{DM})$  is the total energy of the complex,  $E(\text{M})$  is the acceptor energy of free metal ions, and  $E(\text{D})$  the donor energy of free adsorbent dimers.

## Text S5. Adsorption isotherm models

To quantify the adsorption capacity of EDAR, isotherms for adsorption of Pb(II), Cd(II), and Cu(II) on EDAR at 25 °C were investigated by the Langmuir and Freundlich models using the following equations:

Langmuir model [2]: 
$$q_e = \frac{q_m K_L C_e}{1 + K_L C_e} \quad (S4)$$

Freundlich model [3]: 
$$q_e = K_F C_e^{\frac{1}{n}} \quad (S5)$$

where  $C_e$  is the equilibrium concentration of the metal ion (mM),  $q_e$  is the equilibrium adsorption capacity (mmol/g),  $q_m$  (mmol/g) and  $K_L$  (L/mmol) are the maximum adsorption capacity and Langmuir constant, respectively.  $K_F$  [(mmol/g) (mmol/L)<sup>1/n</sup>] and  $n$  are the Freundlich constants related to adsorption capacity and adsorption intensity parameter, respectively.

# Text S6. Adsorption isotherm models for multi-component systems

For binary and ternary systems [4],

$$\frac{C_{e,1}}{C_{e,2} q_{e,1}} = \frac{C_{e,1}}{q_{m,1} C_{e,2}} + \frac{K_{L,2}}{K_{L,1} q_{e,1}} \quad (S6)$$

$$\frac{C_{e,1}}{q_{e,1} (K_{L,2} C_{e,2} + K_{L,3} C_{e,3})} = \frac{C_{e,1}}{(K_{L,2} C_{e,2} + K_{L,3} C_{e,3}) q_{m,1}} + \frac{1}{q_{m,1} K_{L,1}} \quad (S7)$$

where plots of  $C_{e,1}/C_{e,2}q_{e,1}$  as a function of  $C_{e,1}/C_{e,2}$ , and  $C_{e,1}/q_{e,1}(K_{L,2} C_{e,2} + K_{L,3} C_{e,3})$  as a function of  $C_{e,1}/(K_{L,2} C_{e,2} + K_{L,3} C_{e,3})$  give intercepts of  $K_{L,2}/K_{L,1}q_{e,1}$  and  $1/q_{m,1}K_{L,1}$  for the binary and ternary systems, respectively, with slopes of  $1/q_{m,1}$  in each case.

## Text S7. Calculation of thermodynamic parameters

Thermodynamic parameters, such as the standard Gibbs energy change ( $\Delta G^\circ$ ), enthalpy change ( $\Delta H^\circ$ ), and entropy change ( $\Delta S^\circ$ ) for the adsorption of HMs on EDAR, which are calculated by eqns. S8–S10, can provide in-depth information about the energetic changes associated with adsorption. The equations can be written as follows:

$$\Delta G^\circ = -RT \ln K_d \quad (\text{S8})$$

$$\Delta G^\circ = \Delta H^\circ - T\Delta S^\circ \quad (\text{S9})$$

$$\ln K_d = \frac{\Delta S^\circ}{R} - \frac{\Delta H^\circ}{RT} \quad (\text{S10})$$

where the distribution coefficient ( $K_d = C_{ad}/C_e$ ) is a dimensionless parameter, and represents the ratio of the concentration of solute adsorbed on the EDAR ( $C_{ad}$ ) to the residual concentration of the solute in solution at equilibrium ( $C_e$ ).  $R$  is the universal gas constant (8.314 J/mol/K), and  $T$  is the absolute temperature. Standard enthalpy change ( $\Delta H^\circ$ ) and entropy change ( $\Delta S^\circ$ ) were obtained by plotting of  $\ln K_d$  versus  $1/T$  (SI Figure S5). At all temperatures, the values of  $K_d$  were in the order  $\text{Pb(II)} > \text{Cd(II)} > \text{Cu(II)}$ , which indicates that the affinity of EDAR resin for Pb(II) (a measure of adsorption ability of EDAR for HMs), is higher than for Cd(II) or Cu(II).

## Text S8. Equations for kinetic models

Understanding the reaction kinetics is important for improving the design of adsorption systems. These can be characterized by pseudo-first-order, pseudo-second-order, and intra-particle diffusion kinetic models, which can be written as follows:

First-order kinetic equation [5]:  $\lg(q_e - q_t) = \lg q_e - \frac{k_1}{2.303} t$  (S11)

Second-order kinetic equation [6]:  $\frac{t}{q_t} = \frac{1}{k_2 q_e^2} + \frac{t}{q_e}$  (S12)

Intra-particle diffusion equation [7]:  $q_t = k_p t^{0.5} + C$  (S13)

where  $q_e$  and  $q_t$  are the amounts (mmol) of adsorbate adsorbed per gram of adsorbent at equilibrium and at time  $t$  (min) respectively;  $k_1$  (1/min) and  $k_2$  (g/mmol/min) are the adsorption rate constants of the pseudo-first-order and pseudo-second-order kinetics reactions, respectively;  $k_{id}$  is the intraparticle diffusion rate constant (mmol/g/min<sup>0.5</sup>); and  $c_i$  is a constant associated with the boundary layer thickness.

## Text S9. Dynamic adsorption performance models.

The Thomas, Yoon-Nelson, and Adams-Bohart models can be used to predict column adsorption performance. The relevant equations are written as follows (Eqs. S14-S16):

Thomas model [8]:

$$\frac{C_t}{C_0} = \frac{1}{1 + \exp(K_{Th} q_0 m / Q - K_{Th} C_0 t)} \quad (S14)$$

Yoon-Nelson model [9]:

$$\frac{C_t}{C_0} = \frac{\exp(K_{YN} t - \tau K_{YN})}{1 + \exp(K_{YN} t - \tau K_{YN})} \quad (S15)$$

Adams-Bohart model [10]:

$$\frac{C_t}{C_0} = \exp \left( k_{AB} C_0 t - k_{AB} N_0 \frac{Z}{F} \right) \quad (S16)$$

where  $k_{Th}$  is the Thomas rate constant (L/min/mmol);  $q_0$  is the uptake of HMs per g of the adsorbent (mmol/g) at equilibrium;  $m$  is the amount of adsorbent in the column (g);  $V_{eff}$  is the effluent volume (mL);  $C_0$  and  $C_t$  are the initial HM concentrations and at time  $t$  (mM);  $v$  is flow rate (L/min). The value of  $t$  is time (min,  $t = V_{eff}/V$ ).  $k_{AB}$  is the kinetic constant (ml/mmol/min),  $F$  is the linear velocity calculated by dividing the flow rate by the column section area (cm/min),  $Z$  is the bed depth of column and  $N_0$  is the saturation concentration (mM).  $k_{YN}$  is the rate constant (1/min) and is  $\tau$ , the time required for 50% adsorbate breakthrough (min).

## Fig. S1

The effect of adsorbent dose on the adsorption process was studied by varying the dose of EDAR in the range 0.2–2.0 g/L. As shown in Figure S1, the removal efficiencies for HMs increased with adsorbent dose for low adsorbent concentration, but reached a maximum with Pb for 0.5 g/L, although with both Cd and Cu there was increased adsorption up to 2.0 g/L. Therefore, taking into account the efficiency and economy of operation, 1.0 g/L (solid-to-liquid ratio) was chosen as the optimum adsorbent dosage for all subsequent experiments.

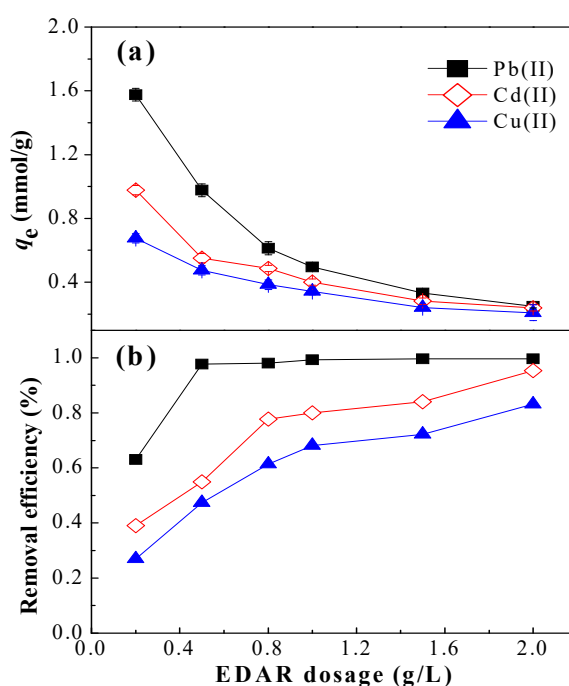

**Fig. S1.** Effect of adsorbent dose on HMs adsorption on EDAR (a) and removal from solution (b). Experimental conditions:  $[HMs]_0 = 0.5$  mM, contact time = 24 h, pH 5.0,  $21 \pm 1$  °C.

**Fig. S2**

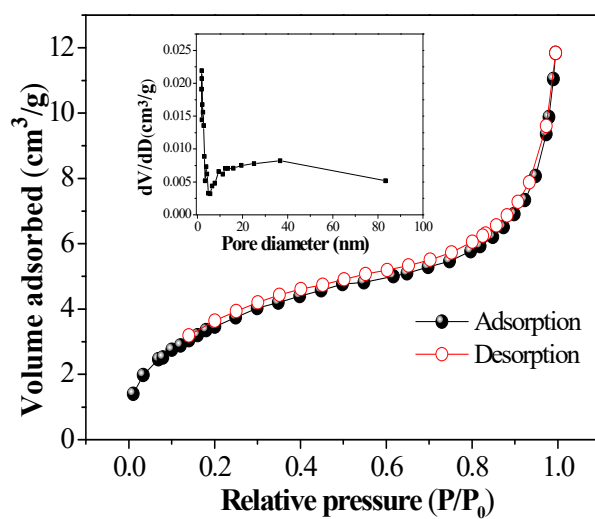

**Fig. S2.** N<sub>2</sub> adsorption-desorption isotherms for EDAR.

**Fig. S3**

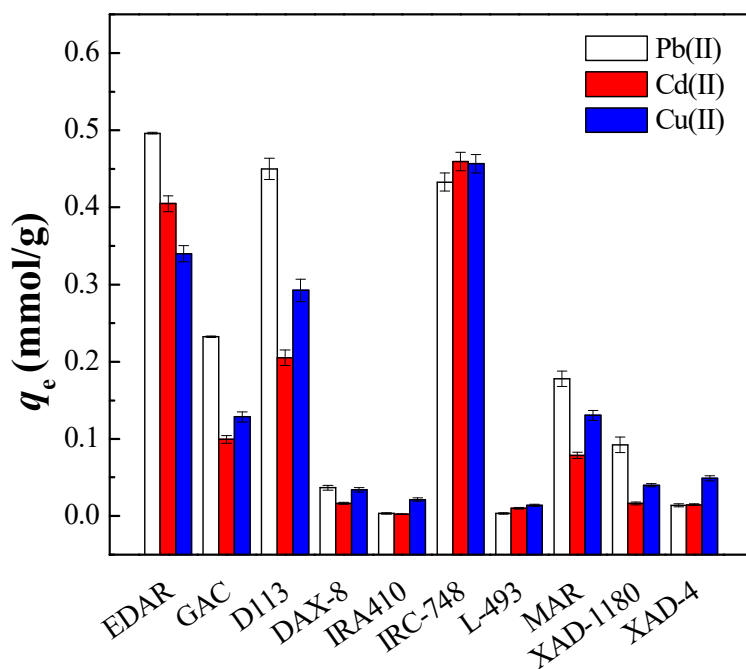

**Fig. S3.** Adsorption of 0.5 mM Pb(II), Cd(II) and Cu(II) on various adsorbents at pH 5.0 and 25 °C using 1.0 g/L adsorbent.

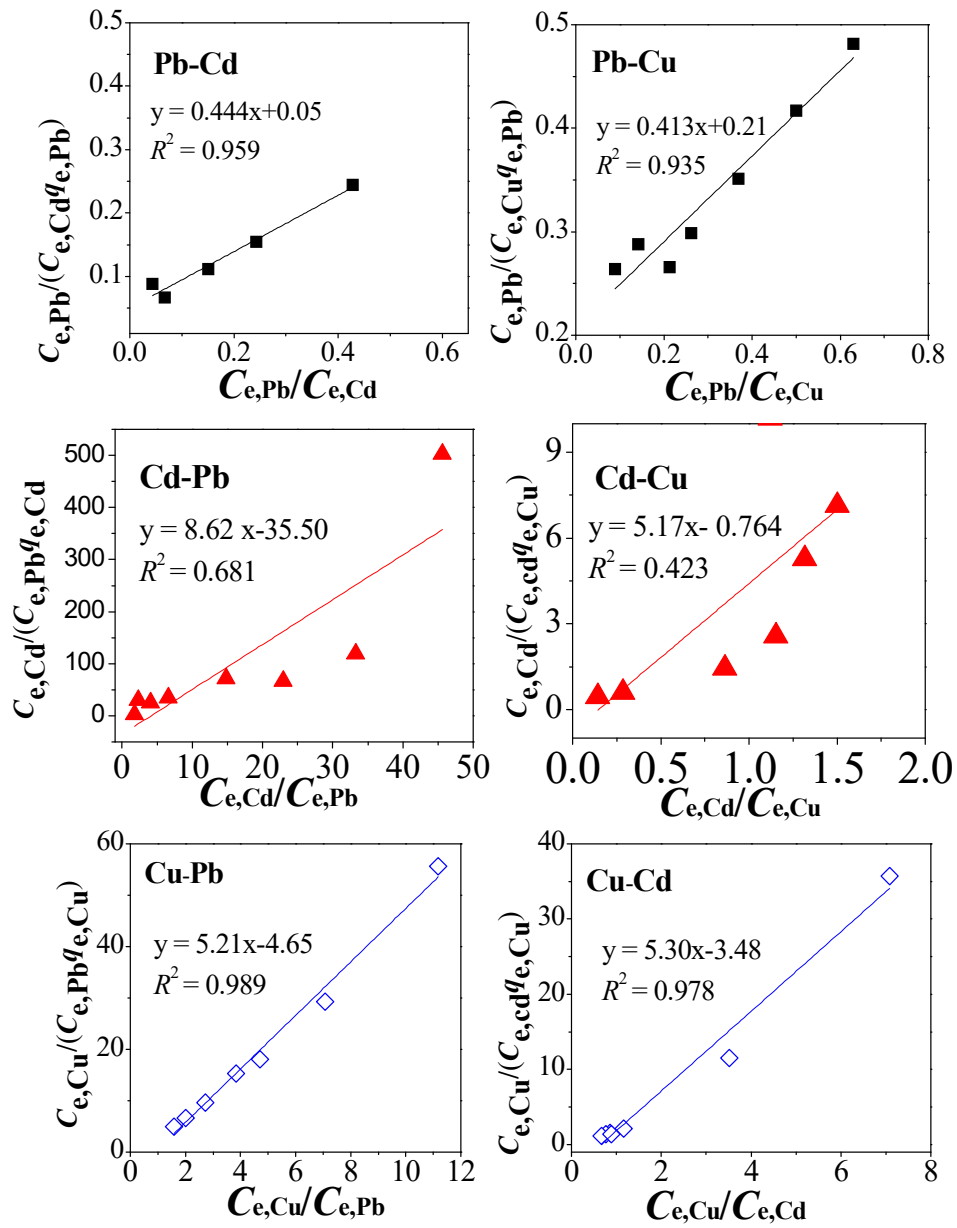

232

233 **Fig. S4.** Experimental results for the competitive adsorption of Pb, Cd, and Cu in  
 234 binary systems presented in the linear form of the Langmuir competitive model.

235

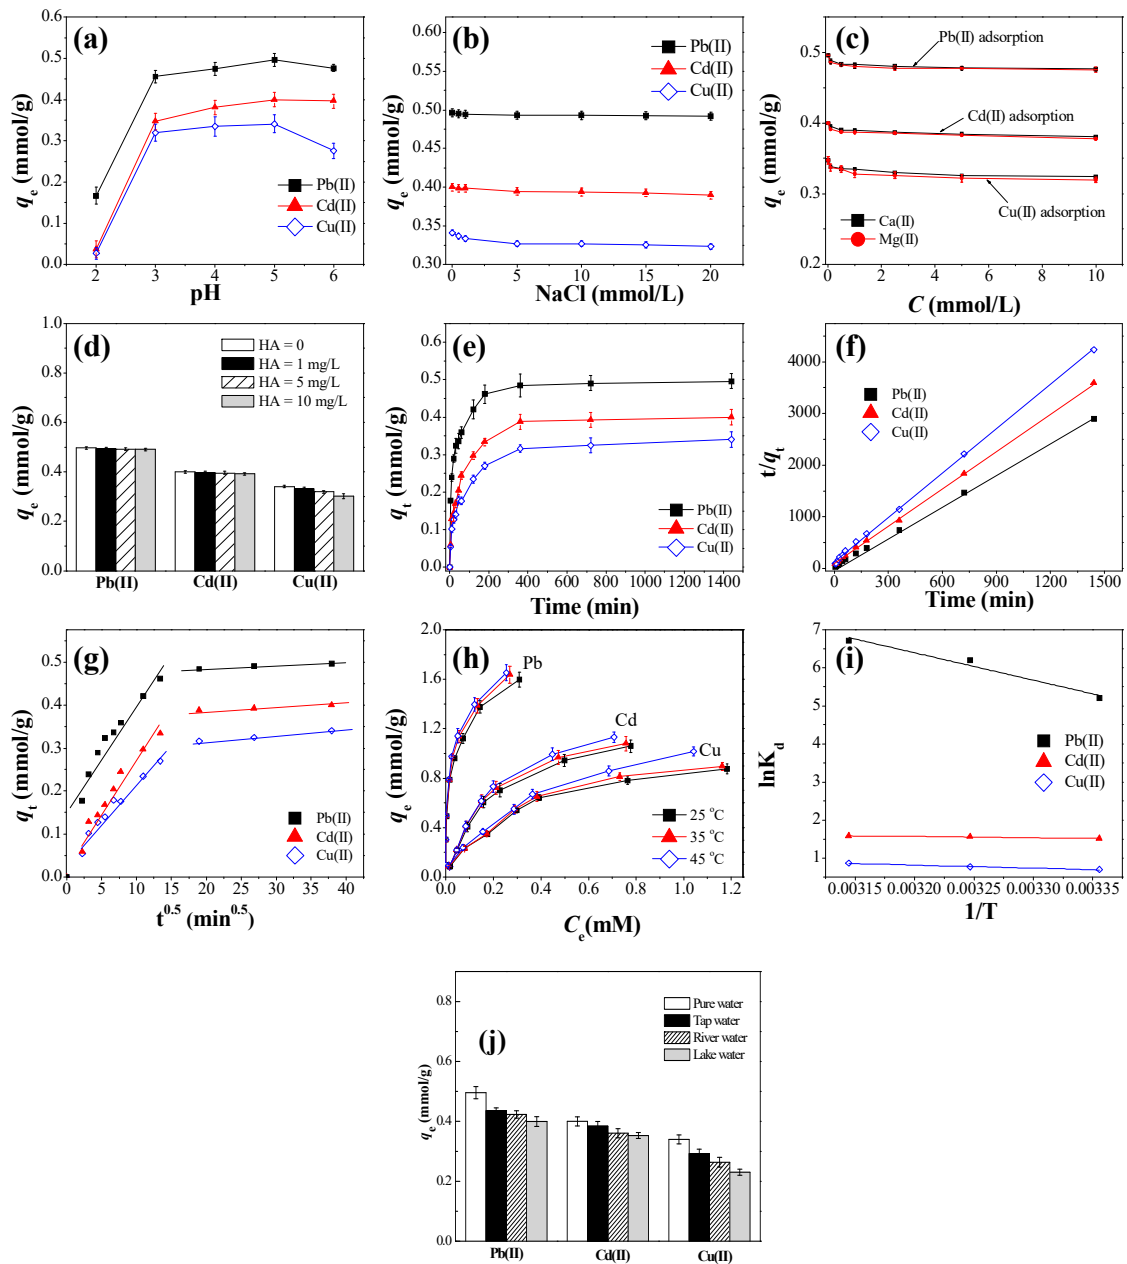

239 **Fig. S5.** Effect of different parameters on the adsorption of HMs by EDAR. (a)  
 240 solution pH; (b) ionic strength; (c) Ca(II) and Mg(II); (d) HA. (e) contact time; (f)  
 241 pseudo-second-order model; (g) intra-particle diffusion model; (h) temperature; (i)  
 242 plots of  $\ln k_d$  versus  $1/T$  for the adsorption of HMs by EDAR; (j) effects of different  
 243 water matrixes. [HMs] = 0.5 mM (except for adsorption isotherm test), [EDAR  
 244 dosage] = 1.0 g/L, pH 5.0(except for pH test), 25 °C (except for temperature test).

245 **Fig. S6**

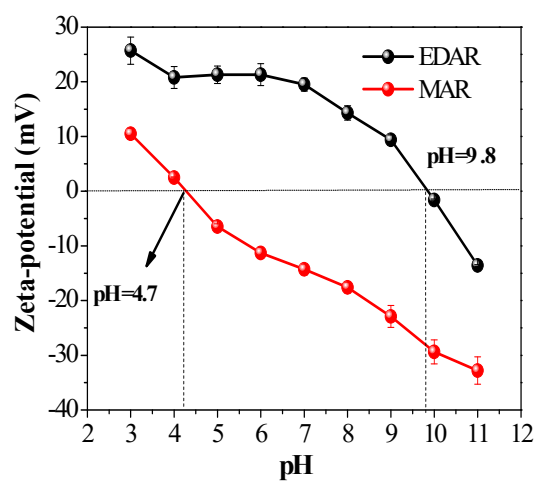

246

247 **Fig. S6** Variation in zeta potential of EDAR and MAR as a function of pH

248

249 **Fig. S7**

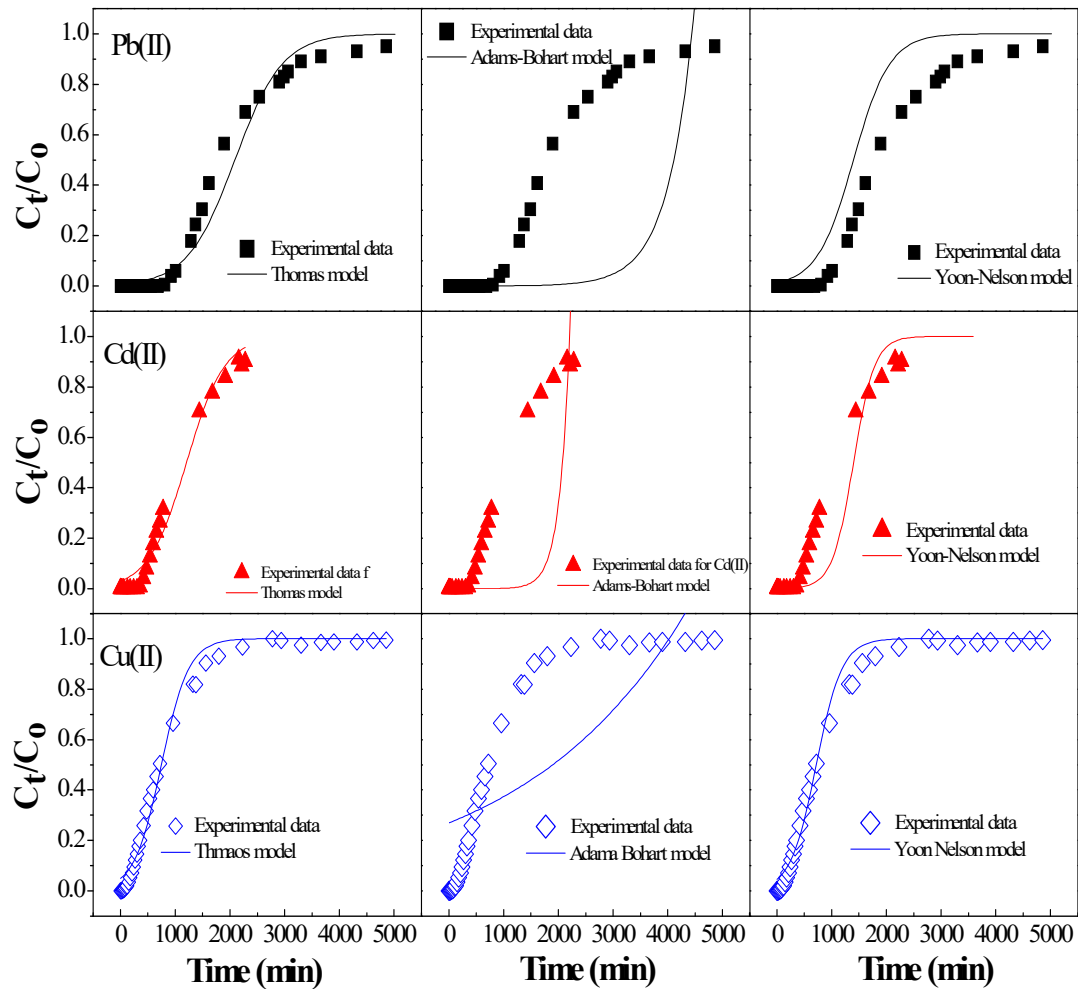

250  
251 **Fig. S7.** Comparison of experimental curves for adsorption of Pb(II), Cd(II), and  
252 Cu(II) on EDAR with predicted breakthrough curves obtained from the Thomas,  
253 Adams Bohart, and Yoon–Nelson models.

255 **Fig. S8**

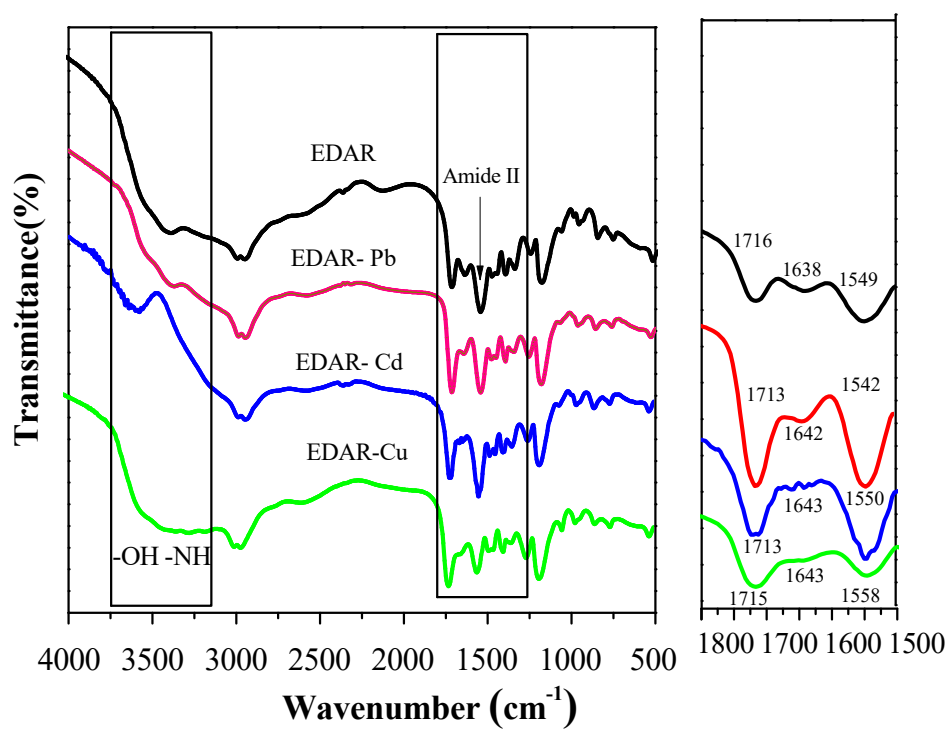

256

257 **Fig. S8.** FTIR spectra of EDAR before and after adsorption of Pb(II), Cd(II), and

258 Cu(II).

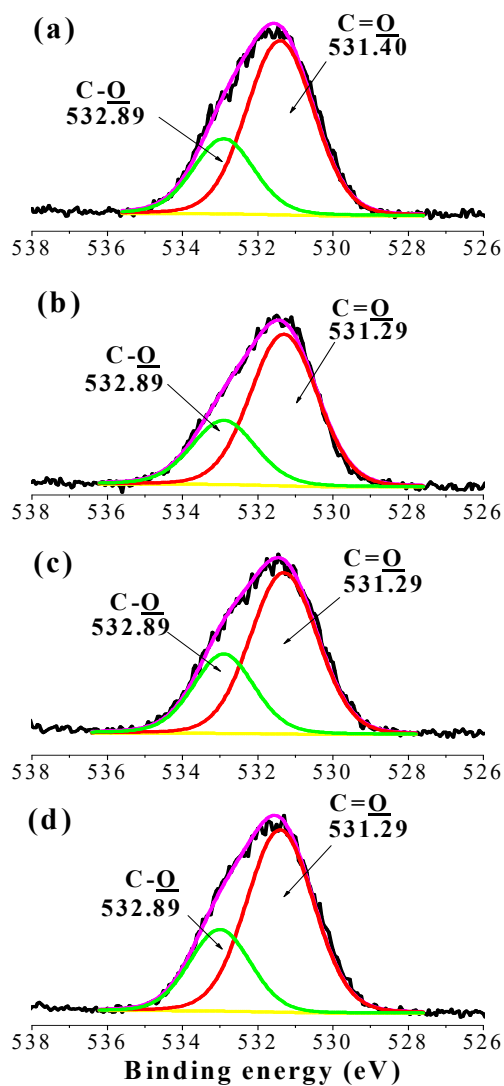

260

261 **Fig. S9.** XPS O1s spectra of EDAR before (a) and after adsorption of Pb(II) (b),

262 Cd(II) (c), and Cu(II) (d).

263 **Fig. S10**

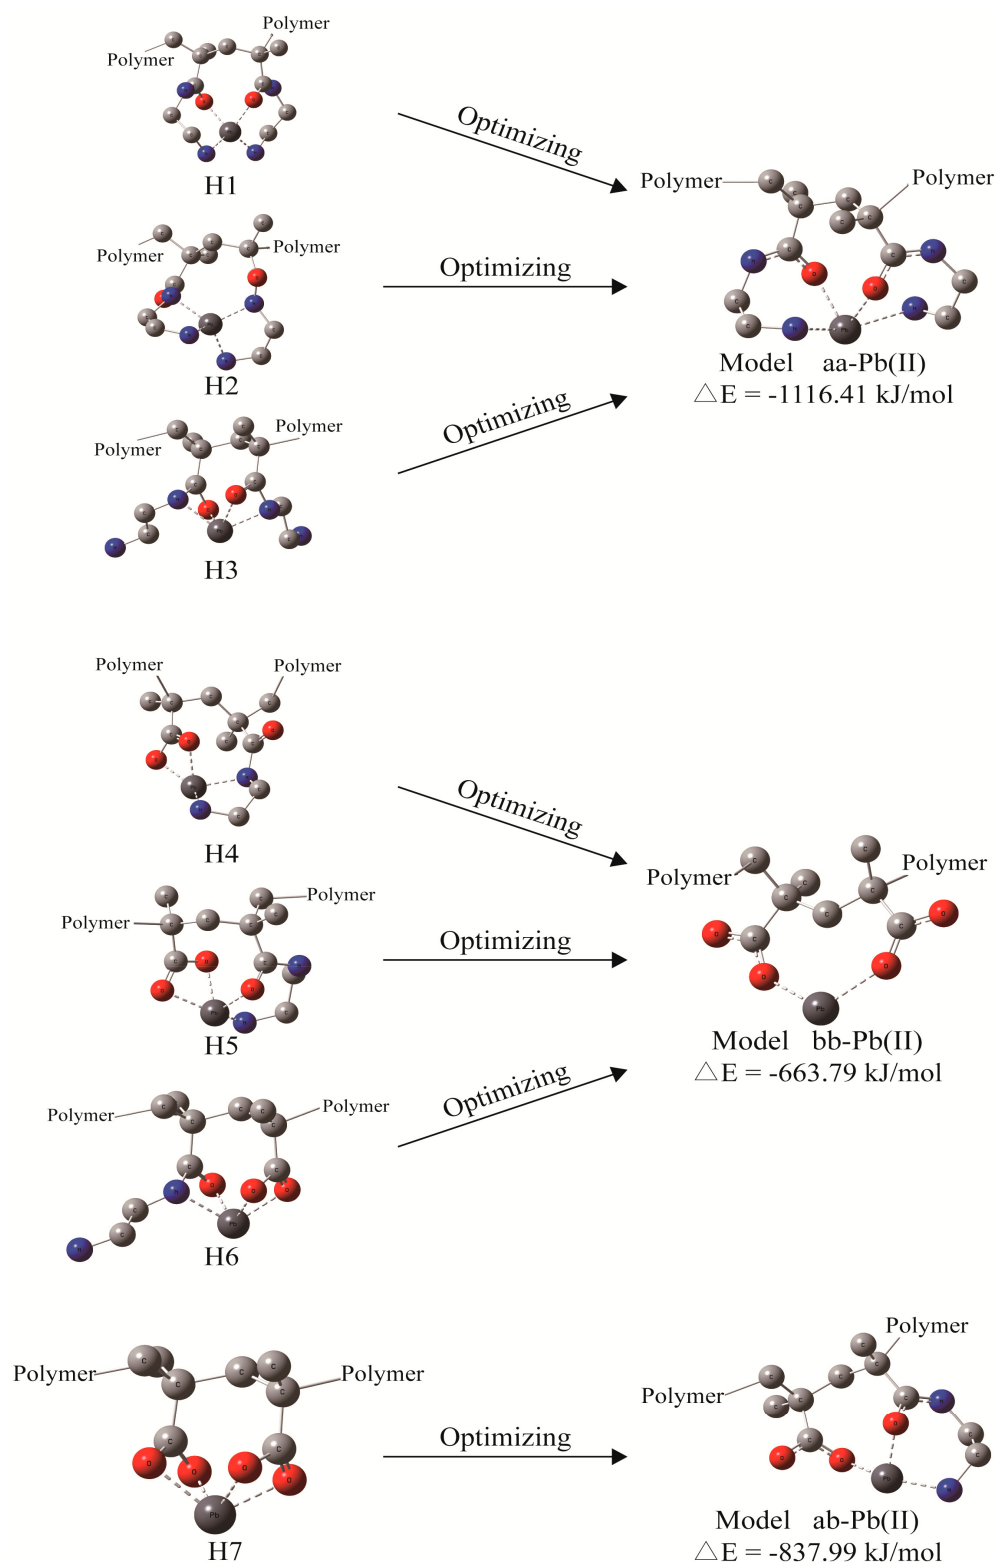

264

265 **Fig. S10.** Initial geometries (H1-H7) used for calculations of Pb(II) coordination to

266 EDAR, and the corresponding optimized coordination geometries (O1-O3).

267 **Table S1**

268 Table S1. Physicochemical properties of commercial adsorbents used in the study.

| Adsorbent        | Particle size<br>(mm) | BET surface area<br>(m <sup>2</sup> /g) | Average pore<br>diameter<br>(nm) | Pore volume<br>(cm <sup>3</sup> /g) | Matrix structure                 | Functional group                                                                      |
|------------------|-----------------------|-----------------------------------------|----------------------------------|-------------------------------------|----------------------------------|---------------------------------------------------------------------------------------|
| Activated carbon |                       | 680                                     |                                  | 0.78                                |                                  | -COOH, -OH                                                                            |
| DAX-8            | 0.24-0.32             | 75.8                                    | 144.2                            |                                     | Polymethylmethacrylate           | -COOCH <sub>3</sub>                                                                   |
| D301             | 0.4-0.7               | 46.98                                   | 274.72                           | 0.18                                | Polystyrene copolymer            | [-N <sup>+</sup> (CH <sub>3</sub> ) <sub>2</sub> ]                                    |
| D113             | 0.4-0.7               | 4.47                                    | 37.86                            | 0.52                                | Polystyrene copolymer            | (-COOH)                                                                               |
| IRA-410          | 20-60 mesh            |                                         |                                  |                                     | Styrene-divinylbenzene copolymer | -SO <sub>3</sub> H                                                                    |
| IRC 748          | 0.4-0.7               | 19.68                                   | 16.21                            | 0.079                               | Styrene-divinylbenzene copolymer | Iminodiacetic acid                                                                    |
| L-493            |                       | > 1100 <sup>a</sup>                     | 4.6                              | 1.16                                | Styrene-divinylbenzene copolymer |                                                                                       |
| XAD-4            | 0.40-0.70             | >750                                    | 12.5                             | 0.50                                | Styrene-divinylbenzene copolymer | 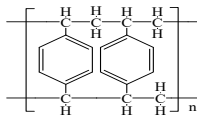 |

269 As available and reported by supplier.

**Table S2**

Table S2. Main characteristics of the natural water samples used in this study

| Water       | DOC<br>(mg/L) | SUVA <sub>254</sub><br>(L/mg·m) | Alkalinity<br>[mM HCO <sub>3</sub> <sup>-</sup> ] | pH  | NH <sub>4</sub> <sup>+</sup><br>(mg/L) |
|-------------|---------------|---------------------------------|---------------------------------------------------|-----|----------------------------------------|
| Tap water   | 1.5           | 1.47                            | 1.0                                               | 7.2 | 0.1                                    |
| River water | 3.4           | 0.69                            | 1.2                                               | 8.0 | 0.4                                    |
| Lake water  | 5.2           | 0.9                             | 2.0                                               | 7.8 | 0.3                                    |

Note: SUVA<sub>254</sub> (specific ultraviolet absorbance) was calculated from the ultraviolet absorbance at 254 nm (UV<sub>254</sub>) divided by the DOC.

# Table S3

Table S3. Adsorption isotherm model constants for single systems at 25 °C

| HMs           | Langmuir isotherm      |                   |       | Freundlich isotherm |                                                 |       |
|---------------|------------------------|-------------------|-------|---------------------|-------------------------------------------------|-------|
|               | $q_{\max}$<br>(mmol/g) | $K_L$<br>(L/mmol) | $R^2$ | $n$                 | $K_F$<br>((mmol/g)<br>(mmol/L) <sup>1/n</sup> ) | $R^2$ |
| Single system |                        |                   |       |                     |                                                 |       |
| Pb(II)        | 1.46                   | 87.61             | 0.893 | 0.27                | 2.25                                            | 0.970 |
| Cd(II)        | 1.34                   | 4.78              | 0.998 | 0.47                | 1.26                                            | 0.951 |
| Cu(II)        | 1.12                   | 3.09              | 0.991 | 0.86                | 0.46                                            | 0.959 |

| Adsorbent                                                                                          | Adsorbate | Adsorbent capacity (mmol/g) | Isotherm model | pH  | T (°C) | Ref.       |
|----------------------------------------------------------------------------------------------------|-----------|-----------------------------|----------------|-----|--------|------------|
| Polyamine-type starch/GMA copolymer                                                                | Pb        | 1.25                        | Langmuir       | 5   | 25     | [11]       |
|                                                                                                    | Cd        | 0.83                        | Langmuir       | 5   | 25     |            |
|                                                                                                    | Cu        | 2.33                        | Langmuir       | 5   | 25     |            |
| Nanocomposite hydrogels based on wheat bran-g-poly(methacrylic acid) and nano-sized clinoptilolite | Pb        | 0.81                        | Langmuir       | 6.8 | 25     | [12]       |
|                                                                                                    | Cd        | 1.57                        | Langmuir       | 6.8 | 25     |            |
|                                                                                                    | Cu        | 3.81                        | Langmuir       | 6.8 | 25     |            |
| Thiol-functionalized cellulose nanofiber membranes                                                 | Pb        | 0.15                        | Langmuir       | 6   | 27     | [13]       |
|                                                                                                    | Cd        | 0.31                        | Langmuir       | 6   | 27     |            |
|                                                                                                    | Cu        | 0.31                        | Langmuir       | 6   | 27     |            |
| Lignin-based resin                                                                                 | Pb        | 0.94                        | Langmuir       | 6   | 25     | [14]       |
|                                                                                                    | Cd        | 0.44                        | Langmuir       | 6   | 25     |            |
|                                                                                                    | Cu        | 0.94                        | Langmuir       | 6   | 25     |            |
| Waste mexerica mandarin “Citrus nobilis” peel                                                      | Pb        | 1.92                        | Langmuir       | 5   | 25     | [15]       |
|                                                                                                    | Cd        | 2.88                        | Langmuir       | 5   | 25     |            |
|                                                                                                    | Cu        | 2.05                        | Langmuir       | 5   | 25     |            |
| Chitosan-iso-vanillin                                                                              | Cd        | 0.34                        | Langmuir       | 5   | 30     | [16]       |
| Torrefied poplar-biomass                                                                           | Pb        | 0.14                        | Sips           | 4   | 20     | [17]       |
| Carboxymethylated cellulose fiber                                                                  | Cu        | 0.36                        | Langmuir       | 6   | 25     | [18]       |
| EDAR                                                                                               | Pb        | 1.8                         | Freundlich     | 5   | 25     | This study |
|                                                                                                    | Cd        | 1.34                        | Langmuir       | 5   | 25     | This study |
|                                                                                                    | Cu        | 1.12                        | Langmuir       | 5   | 25     | This study |

279 **Table S5**

280 Table S5. Kinetic parameters for the adsorption of Pb(II), Cd(II), and Cu(II) on EDAR

| Model                         | Parameter                               | Pb(II)               | Cd(II)               | Cu(II)               |
|-------------------------------|-----------------------------------------|----------------------|----------------------|----------------------|
| Pseudo-first-order model      | $q_{e, cal}$ (mmol/g)                   | 0.21                 | 0.20                 | 0.19                 |
|                               | $k_1$ (1/min)                           | $1.4 \times 10^{-2}$ | $1.3 \times 10^{-2}$ | $9.9 \times 10^{-3}$ |
|                               | $R^2$                                   | 0.873                | 0.899                | 0.891                |
| Pseudo-second-order model     | $q_{e, cal}$ (mmol/g)                   | 0.50                 | 0.40                 | 0.348                |
|                               | $k_2$ (g/mmol/min)                      | 0.12                 | $6.8 \times 10^{-2}$ | $6.7 \times 10^{-2}$ |
|                               | $R^2$                                   | 0.999                | 0.999                | 0.999                |
| Intraparticle diffusion model | $k_{id,1}$ (mmol/g/min <sup>0.5</sup> ) | 0.030                | 0.025                | 0.020                |
|                               | $c_{i,1}$                               | 0.11                 | $2.5 \times 10^{-2}$ | $2.4 \times 10^{-2}$ |
|                               | $R^2$                                   | 0.863                | 0.965                | 0.962                |
|                               | $k_{id,2}$ (mmol/g/min <sup>0.5</sup> ) | $6.1 \times 10^{-3}$ | $6 \times 10^{-3}$   | $1.3 \times 10^{-3}$ |
|                               | $c_{i,2}$                               | 0.474                | 0.375                | 0.292                |
|                               | $R^2$                                   | 0.981                | 0.999                | 0.996                |

# Table S6

Table S6. Thermodynamic parameters for the adsorption of HMs on EDAR (0.5 mM HMs)

| HM     | $\Delta G^\circ$ (kJ/mol) |        |        | $\Delta H^\circ$ | $\Delta S^\circ$ | $R^2$ |
|--------|---------------------------|--------|--------|------------------|------------------|-------|
|        |                           |        |        | (kJ/mol)         | (kJ/mol/K)       |       |
|        | 25°C                      | 35°C   | 45°C   |                  |                  |       |
| Pb(II) | -12.89                    | -15.90 | -17.77 | 59.9             | 0.245            | 0.975 |
| Cd(II) | -3.75                     | -3.99  | -4.19  | 12.98            | 0.081            | 0.987 |
| Cu(II) | -1.73                     | -1.97  | -2.28  | 6.59             | 0.028            | 0.985 |

285 **Table S7**

286 Table S7. Parameters for the Thomas, Adams–Bohart, and Yoon–Nelson dynamic adsorption models fitted for Pb(II), Cd(II), and Cu(II)

| HM     | Thomas model |                      |       | Adams–Bohart model |                       |       | Yoon–Nelson model    |       |
|--------|--------------|----------------------|-------|--------------------|-----------------------|-------|----------------------|-------|
|        | $q_0$        | $K_T$                | $R^2$ | $N_0$              | $K_{AB}$              | $R^2$ | $K_{YN}$             | $R^2$ |
|        | (mmol/g)     | (L/min/mmol)         |       | (mmol/L)           | (ml/mmol/min)         |       | (1/min)              |       |
| Pb(II) | 1.63         | $4.2 \times 10^{-3}$ | 0.982 | 655.3              | $1.37 \times 10^{-2}$ | 0.852 | $2.9 \times 10^{-3}$ | 0.853 |
| Cd(II) | 1.20         | $5.7 \times 10^{-3}$ | 0.979 | 1245.7             | $8.17 \times 10^{-3}$ | 0.311 | $2.0 \times 10^{-3}$ | 0.961 |
| Cu(II) | 0.75         | $2.2 \times 10^{-3}$ | 0.987 | 1921.5             | $6.46 \times 10^{-3}$ | 0.602 | $1.6 \times 10^{-3}$ | 0.856 |

287

**Table S8**

Table S8. Changes in lengths of selected bonds in aa model of EDAR and a result of complexation with Pb(II) (in Å°)

| Chemical<br>Bonds | aa model<br>(Å°) | aa-Pb complex<br>model (Å°) | Difference<br>(Å°) |
|-------------------|------------------|-----------------------------|--------------------|
| C8=O19            | 1.26             | 1.30                        | 0.042              |
| C11-N12           | 1.46             | 1.50                        | 0.045              |
| C8-N9             | 1.37             | 1.34                        | -0.033             |
| C14=O28           | 1.26             | 1.29                        | 0.030              |
| C17-N18           | 1.47             | 1.50                        | 0.029              |
| C14-N15           | 1.36             | 1.34                        | -0.02              |

### Supplementary References

- [1] Becke, A. D. A new mixing of Hartree–Fock and local density-functional theories. *J. Chem. Phys.* **1993**, 98(2): 1372–1377.
- [2] Langmuir I. The adsorption of gases on plane surfaces of glass, mica and platinum. *J. Am. Chem. Soc.* **1918**, 40, 1361–1403.
- [3] Freundlich H. Concerning adsorption in solutions. *J. Phys. Chem.* **1906**, 57, 385–470.
- [4] Mahamadi, C.; Nharingo, T. Competitive adsorption of  $\text{Pb}^{2+}$ ,  $\text{Cd}^{2+}$  and  $\text{Zn}^{2+}$  ions onto *Eichhornia crassipes* in binary and ternary systems. *Biores Technol*, 2010, 101, 3: 859–864.
- [5] Lagergren S. About the theory of so-called adsorption of soluble substances, *Kungliga Svenska Vetenskapsakademien Handlingar*. 1898, 24: 1–39.
- [6] Ho Y.S.; G. McKay, Pseudo-second order model for sorption processes. *Process. Biochem.* **1999**, 34: 451–465.
- [7] Weber, W.J.; Morris, J.C.; Kinetics of adsorption on carbon from solution, J. Sanit. Eng. Div. Am. Soc. Civ. Eng. **1963**, 89: 31–60.
- [8] Thomas, H. C. Heterogeneous ion exchange in a flowing system. *J Am. Chem. Soc* **1944**, 66(10): 1664–1666.
- [9] Yoon, Y. H.; Nelson, J. H. Application of gas adsorption kinetics—II. A theoretical model for respirator cartridge service life and its practical applications. *Am. Ind. Hyg. Assoc. J* **1984**, 45(8): 517–524.
- [10] Bohart, G.; Adams, E. Some aspects of the behavior of charcoal with respect to chlorine. 1. *J. Am. Chem. Soc.* **1920**, 42(3): 523–544.
- [11] Chen, Y.N.; Zhao, W.; Wang, H.; Meng, X.H.; L.J. Zhang, A novel polyamine-type starch/glycidyl methacrylate copolymer for adsorption of  $\text{Pb(II)}$ ,  $\text{Cu(II)}$ ,  $\text{Cd(II)}$  and  $\text{Cr(III)}$  ions from aqueous solutions. *Roy Soc Open Sci.* **2018**, 5: 180281.

- 320 [12] Barati, A.; Moghadam, E.A.; T. Miri, M. Asgari, Rapid removal of heavy  
321 metal cations by novel nanocomposite hydrogels based on wheat bran and  
322 clinoptilolite: Kinetics, thermodynamics, and isotherms. *Water Air Soil Poll.*  
323 **2014**, 225: 2096.
- 324 [13] T. Xiang, Z.L. Zhang, H.Q. Liu, Z.Z. Yin, L. Li, X.M. Liu, Characterization  
325 of cellulose-based electrospun nanofiber membrane and its adsorptive  
326 behaviours using Cu(II), Cd(II), Pb(II) as models. *Sci Chin Chem*, **2013**, 56:  
327 567–575.
- 328 [14] Liang, F.B.; Song, Y.L.; Huang, C.P.; Li, Y.X.; Chen, B.H. Synthesis of novel  
329 lignin-based ion-exchange resin and its utilization in heavy metals removal.  
330 *Ind Eng Chem Res*, 2013, 52: 1267–1274.
- 331 [15] Inagaki, C.S.; Caretta, T.D.; Alfaya, R.V.D.; Alfaya, A.A.D.; Mexerica  
332 mandarin (*Citrus nobilis*) peel as a new biosorbent to remove Cu(II), Cd(II),  
333 and Pb(II) from industrial effluent. *Desalin Water Treat*, **2013**, 51:  
334 5537–5546.
- 335 [16] Alakhras, F. Biosorption of Cd(II) Ions from Aqueous solution using  
336 chitosan-iso-vanillin as a low-cost sorbent: Equilibrium, kinetics, and  
337 thermodynamic studies. *Arab J Sci Eng*, **2018**, 44: 279–288.
- 338 [17] Demey, H.; Melkior, T.; Chatroux, A.; Attar, K.; Thiery, S.; Miller, H.;  
339 Grateau, M.; Sastre, A.M.; Marchand, M. Evaluation of torrefied  
340 poplar-biomass as a low-cost sorbent for lead and terbium removal from  
341 aqueous solutions and energy co-generation. *Chem Eng J*, **2019**, 361:  
342 839–852.
- 343 [18] Wang, J.; Liu, M.; Duan, C.; Sun, J.P.; Xu, Y.W. Preparation and  
344 characterization of cellulose-based adsorbent and its application in heavy  
345 metal ions removal. *Carbohydr Polymer*, **2019**, 206: 837–843.
- 346
- 347
